# Supplementary material
Source: HighWire-hosted journal article supplement (doi:10.1101/rna.079270.122)
Supplement: Supplemental_Legends.docx [file Supplemental_Legends.docx]

**Supplementary figures and tables legends**

**Table S1.** Details of the differential expression analysis results obtained for the enriched proteins in SINV-J2-IP *versus* mock-J2-IP. Proteins are listed based on increasing adj. pvalue.

**Table S2.** Details of the differential expression analysis results obtained for the enriched proteins in SINV-J2-IP *versus* SINV-IgG-IP. Proteins are listed based on increasing adj. pvalue.

**Table S3.** Details of the differential expression analysis results obtained for the enriched proteins in mock-J2-IP *versus* mock-IgG-IP. Proteins are listed based on increasing adj. pvalue.

**Figure S1. DsRNA-associated protein profiles in mock and SINV-GFP infected HCT116 cells A)** Silver-stained 4-20% Tris-SDS-PAGE gel of the total lysates (INPUT) and eluates from J2- or IgG control-IP in mock and SINV-infected cellsused for proteomic analysis. **B)** Hierarchical clustering of the J2-IP SINV (in orange) and mock (in green) infected samples. **C-D)** Volcano plots of dsRNA-IP (J2-IP) *versus* IgG control-IP **(C)** in SINV-infected and **(D)** in mock-infected conditions using data from three replicates. Red and blue dots represent proteins which are significantly enriched or depleted (adjusted p-value < 0.05, a minimum of 5 SpC in the most abundant condition and abs(Log2FC) > 1), respectively, in the J2-IP samples compared to the IgG control-IP ones. Viral non-structural proteins are indicated in orange. Known dsRNA binding proteins are indicated by a black square. Proteins present in paraspeckles are indicated by a black circle and a light blue name. **E)** GO term enrichment analysis of the dsRNA-associated proteins overrepresented in SINV-J2-IP compared to mock-J2-IP using the Enrichr software. Enriched GO terms of molecular functions (green), cellular components (yellow) and biological processes (purple) are respectively sorted by p-value.

**Figure S2. SFPQ depletion by siRNA in HCT116 and SK-N-BE(2) cells reduces SINV-GFP infection. A)** MTT assay results on HCT116 cell proliferation upon treatment with siCTRL (in blue) or siSFPQ (in orange), measured at 24, 48 and 72 h of growth. **B-C**) Western blot performed on samples from siCTRL and siSFPQ-treated HCT116 cells in mock and SINV infection at the indicated time points and MOI. Antibodies directed against SFPQ and the viral capsid protein were used. Tubulin was used as loading control. **D**) Representative pictures of SINV-GFP infected cells in siCTRL and siSFPQ treated SK-N-BE(2) cells.GFP expression was measured by microscopy. BF, brightfield. Scale bar: 100 µm**. E**) Western blot performed on non-transfected (NT) mock and infected cells and on SINV-GFP infected cells upon siCTRL and siSFPQ treatment. Antibodies directed against SFPQ and the viral capsid protein were used. Tubulin was used as loading control. **F)** Viral production of SINV-GFP upon siCTRL and siSFPQ transfection measured by plaque assay (PFU/mL) on three independent biological replicates. Infection conditions: 24 hours at MOI of 0.1. Each replicate is indicated with a different coloured dot. Error bars represent the mean +/- standard deviation (SD) of three independent experiments, * p < 0.05, paired Student’s t test.

**Figure S3. Depletion of one *SFPQ* allele by CRISPR/Cas9 in HCT116 cells reduces SINV-GFP infection. A)** Schematic representation of the CRISPR/Cas9 knockout strategy used to generate the (+/-) *SFPQ* HCT116 cells. Two gRNAs spanning the exon 2/intron 2 junction were used to direct Cas9 cleavage and the deletion of about 300 bp including the intron 2 5’splice site (5’ss). **B**) Agarose gel showing the PCR fragments corresponding to the WT and KO alleles respectively. Sequencing of the PCR fragment corresponding to the KO allele is shown in (A). **C-D-E)** Effect of *SFPQ* heterozygous knock-out in HCT116 cells. **C)** Representative pictures of SINV-GFP infected cells in WT and (+/-) *SFPQ* HCT116 cells**.** GFP expression was measured by microscopy. BF, brightfield. Scale bar: 100 µm. **D)** Western blot performed on mock and infected cells in WT and (+/-) *SFPQ* HCT116 cells. Antibodies directed against SFPQ and the viral capsid protein were used. Tubulin was used as loading control. **E)** Viral production of SINV-GFP in WT and (+/-) *SFPQ* HCT116 cells measured by plaque assay (PFU/mL) on three independent biological replicates. Infection conditions: 24 hours at MOI of 0.1. Each replicate is indicated with a different coloured dot. Error bars represent the mean +/- standard deviation (SD) of three independent experiments, * p < 0.05, paired Student’s t test. **F**) MTT assay results on cell proliferation of WT (in blue) and (+/-) *SFPQ* (in orange) HCT116 cells measured at 24, 48 and 72 h of growth.

**Figure S4**. **SFPQ localization and binding to SINV antigenomic RNA**. **A**) Confocal immunofluorescence analysis on HCT116 cells in mock and SINV WT infection conditions. Antibodies against G3BP1, NONO and SFPQ were used (yellow signals). Antibody against dsRNA (J2) was used as a positive control of infection. DAPI was used to stain the nuclei (in blue in the merge). Magnification 20X(4X). **B**) Western blot against SFPQ upon cell fractionation on HCT116 cells in mock and SINV-GFP infection conditions. Antibodies against Histone 3 (H3) and Paxillin were used to control the nuclear (N) and cytoplasmic © fractions respectively. GFP was used as a control of the infection. **C**) Confocal co-immunofluorescence analysis on mock and SINV WT infected HCT116 cells. Anti-SFPQ rabbit antibody (in purple) or anti-dsRNA J2 mouse antibody (in yellow) were used. Merge is shown in Figure 4B. DAPI was used to stain the nuclei (in grey). Magnification 63X(3X). **D**) Strand-specific RT-PCR on SINV antigenome using total RNA (INPUT) and RNA isolated upon IgG or SFPQ RIP from SINV-infected samples. RT-, negative control.

**Figure S5. SFPQ binding to viral RNA is independent of ssRNA. A)** RNA analysis on agarose gel upon RNase T1 treatment on mock and SINV infected total lysates. **B)** Anti-SFPQ western blot performed on total lysate (INPUT), J2- or IgG-IP in mock and SINV infected HCT116 cells with or without RNase T1 treatment. Antibodies against PKR (positive control, dsRBP) and AGO2 (negative control, ssRBP) were used.

**Figure S6.** Western blot in mock-infected HCT116 cells first treated with siCTRL or siSFPQ3’UTR and then transfected with a control myc-BFP, a myc-SFPQ WT or a myc-SFPQ RRM1-2 plasmid. Antibodies directed against the myc-tag and the SFPQ protein were used. Ponceau staining and tubulin antibody were used as loading controls.
